# Supplementary material
Source: Springer Nature journal article supplement (https://www.springermedizin.de/resource/supplementary/13102_2011_84_MOESM2_ESM.pdf/9667700)
Supplement: MOESM2 [file 9667700]

# Percutaneous & Minimally Invasive Suture Techniques

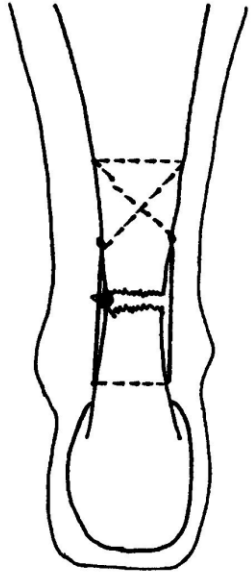

Ma & Griffiths

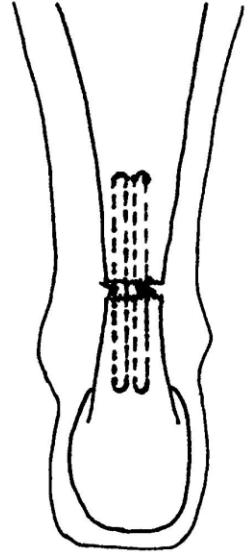

Webb & Bannister

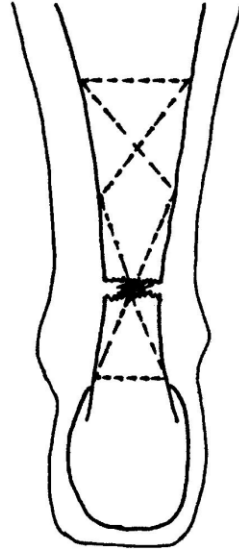

Carmont & Maffulli

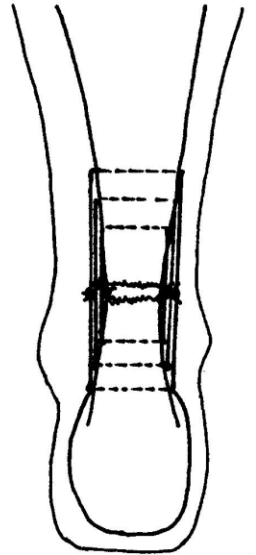

Assal & Achillon
